# Supplementary material
Source: MDPI journal article supplement (https://www.mdpi.com/2071-1050/12/19/8131)
Supplement: s1 [file s1]

Attached 1: Survey

# Walkability evaluation of the main PoliTO campus

(From Corso Duca to Via Boggio)

Study area: the PoliTO campus (green border) and the surrounding area (red border).

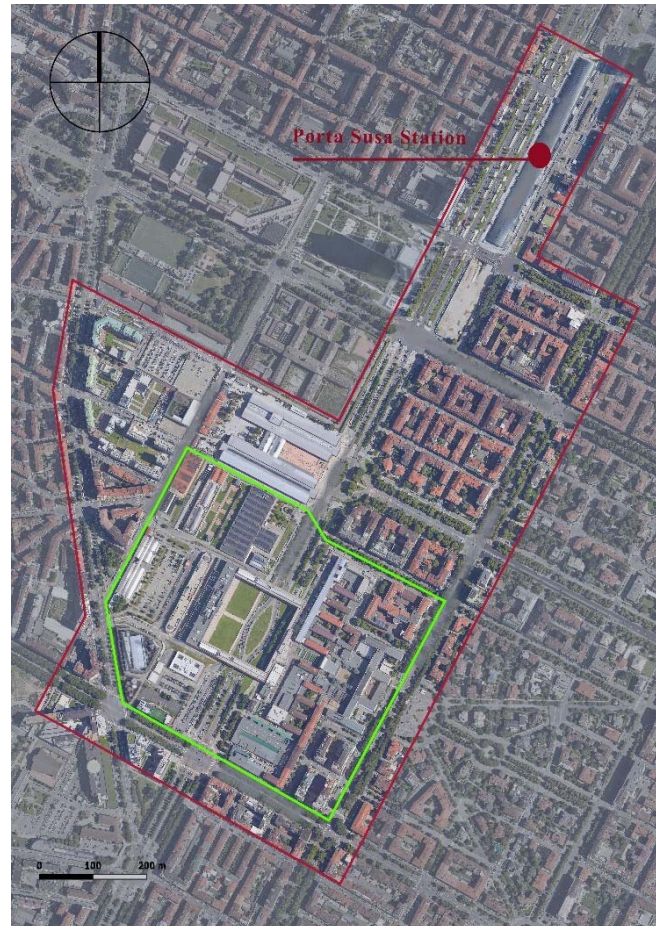

## 1. What is your role inside the PoliTO campus?

*Mark one option.*

- ☐ Student
- ☐ Teacher/Research Fellow/PhD
- ☐ student
- ☐ Administrative staff

**In literature, the walkability indexes have the following evaluation ranges:**

|                                                                            |        |
|----------------------------------------------------------------------------|--------|
| Quality of routes (physical characteristics, e.g. good sidewalk condition) | 21–40% |
| Security                                                                   | 25–50% |
| Comfort (e.g. pleasantness, presence of services and greenery...)          | 10–30% |
| Integration with other transport modes (e.g. car, bus, bike)               | 10–20% |

**Not considering the evaluation ranges in the literature (described for information), indicate the percentage according to your judgment for each index, considering that the sum of the percentages should be 100%, for example:**

|                                             |     |
|---------------------------------------------|-----|
| Quality of routes                           | 25% |
| Security                                    | 25% |
| Comfort                                     | 25% |
| Integration with other transportation modes | 25% |
| Total = 100%                                |     |

**2. Quality of routes (please write the %)**

---

**3. Security (please write the %)**

---

**4. Comfort (please write the %)**

---

**5. Integration with other transportation modes (please write the %)**

---

**Answer the following questions according to the following evaluation scale, where:**

**1= strong disagreement;**

**2= disagreement;**

**3= don't know;**

**4= agreement;**

**5= total agreement**

**Considering overall the pedestrian routes within the PoliTO campus (green border), these are:**

**6. Sufficiently wide for abundant flows**

*Mark one option.*

|                     | 1                     | 2                     | 3                     | 4                     | 5                     |                 |
|---------------------|-----------------------|-----------------------|-----------------------|-----------------------|-----------------------|-----------------|
| Strong disagreement | <input type="radio"/> | Total agreement |

**7. In good conditions**

*Mark one option.*

|                     | 1                     | 2                     | 3                     | 4                     | 5                     |                 |
|---------------------|-----------------------|-----------------------|-----------------------|-----------------------|-----------------------|-----------------|
| Strong disagreement | <input type="radio"/> | Total agreement |

**8. Sliding (without obstacles)**

*Mark one option.*

|                     | 1                     | 2                     | 3                     | 4                     | 5                     |                 |
|---------------------|-----------------------|-----------------------|-----------------------|-----------------------|-----------------------|-----------------|
| Strong disagreement | <input type="radio"/> | Total agreement |

**9. Well connected with the outside**

*Mark one option.*

|                     | 1                     | 2                     | 3                     | 4                     | 5                     |                 |
|---------------------|-----------------------|-----------------------|-----------------------|-----------------------|-----------------------|-----------------|
| Strong disagreement | <input type="radio"/> | Total agreement |

**10. With slope (e.g. stairs, rises...)**

*Mark one option.*

|                     | 1                     | 2                     | 3                     | 4                     | 5                     |                 |
|---------------------|-----------------------|-----------------------|-----------------------|-----------------------|-----------------------|-----------------|
| Strong disagreement | <input type="radio"/> | Total agreement |

**Considering overall the pedestrian routes outside the PoliTO campus (red border), these are:**

**11. Sufficiently wide for abundant flows**

*Mark one option.*

|                     | 1                     | 2                     | 3                     | 4                     | 5                     |                 |
|---------------------|-----------------------|-----------------------|-----------------------|-----------------------|-----------------------|-----------------|
| Strong disagreement | <input type="radio"/> | Total agreement |

**12. In good conditions**

*Mark one option.*

|                     | 1                     | 2                     | 3                     | 4                     | 5                     |                 |
|---------------------|-----------------------|-----------------------|-----------------------|-----------------------|-----------------------|-----------------|
| Strong disagreement | <input type="radio"/> | Total agreement |

**13. Sliding (without obstacles)**

*Mark one option.*

|                     | 1                     | 2                     | 3                     | 4                     | 5                     |                 |
|---------------------|-----------------------|-----------------------|-----------------------|-----------------------|-----------------------|-----------------|
| Strong disagreement | <input type="radio"/> | Total agreement |

**Considering the pedestrian paths inside and outside the PoliTO campus, these cross:**

**14. Busy roads (with vehicles)**

*Mark one option.*

|                     | 1                     | 2                     | 3                     | 4                     | 5                     |                 |
|---------------------|-----------------------|-----------------------|-----------------------|-----------------------|-----------------------|-----------------|
| Strong disagreement | <input type="radio"/> | Total agreement |

**15. Traffic light pedestrian crossings with sufficient time**

*Mark one option.*

|                     | 1                     | 2                     | 3                     | 4                     | 5                     |                 |
|---------------------|-----------------------|-----------------------|-----------------------|-----------------------|-----------------------|-----------------|
| Strong disagreement | <input type="radio"/> | Total agreement |

**16. Non-lighted pedestrian crossings in neighborhood streets**

*Mark one option.*

|                     | 1                     | 2                     | 3                     | 4                     | 5                     |                 |
|---------------------|-----------------------|-----------------------|-----------------------|-----------------------|-----------------------|-----------------|
| Strong disagreement | <input type="radio"/> | Total agreement |

**17. Other physically separated traffic flows (e.g. bus, bikes, cars...)**

*Mark one option.*

|                     | 1                     | 2                     | 3                     | 4                     | 5                     |                 |
|---------------------|-----------------------|-----------------------|-----------------------|-----------------------|-----------------------|-----------------|
| Strong disagreement | <input type="radio"/> | Total agreement |

**Considering the pedestrian paths inside and outside the PoliTO campus, these are characterized by:**

**18. Unpleasant noises (e.g. traffic, construction sites...)**

*Mark one option.*

|                     | 1                     | 2                     | 3                     | 4                     | 5                     |                 |
|---------------------|-----------------------|-----------------------|-----------------------|-----------------------|-----------------------|-----------------|
| Strong disagreement | <input type="radio"/> | Total agreement |

**19. Covered routes that offer shelter from the rain and the sun**

*Mark one option.*

|                     | 1                     | 2                     | 3                     | 4                     | 5                     |                 |
|---------------------|-----------------------|-----------------------|-----------------------|-----------------------|-----------------------|-----------------|
| Strong disagreement | <input type="radio"/> | Total agreement |

**20. Presence of trees and meadows**

*Mark one option.*

|  | 1                     | 2                     | 3                     | 4                     | 5                     |  |
|--|-----------------------|-----------------------|-----------------------|-----------------------|-----------------------|--|
|  | <input type="radio"/> |  |

Strong disagreement

Total agreement

**21. Presence of baskets**

*Mark one option.*

1 2 3 4 5

Strong disagreement

☐ ☐ ☐ ☐ ☐

Total agreement

**22. Adequate lighting during the night/evening hours**

*Mark one option.*

1 2 3 4 5

Strong disagreement

☐ ☐ ☐ ☐ ☐

Total agreement

**23. Presence of points where you can stop (e.g. benches)**

*Mark one option.*

1 2 3 4 5

Strong disagreement

☐ ☐ ☐ ☐ ☐

Total agreement

**24. Presence of "water points"**

*Mark one option.*

1 2 3 4 5

Strong disagreement

☐ ☐ ☐ ☐ ☐

Total agreement

**25. Presence of tall buildings (from 4 floors up)**

*Mark one option.*

1 2 3 4 5

Strong disagreement

☐ ☐ ☐ ☐ ☐

Total agreement

**26. Presence of buildings with monotonous colours**

*Mark one option.*

1 2 3 4 5

Strong disagreement

☐ ☐ ☐ ☐ ☐

Total agreement

**27. Possibility to see the continuity of the route**

*Mark one option.*

1 2 3 4 5

Strong disagreement

☐ ☐ ☐ ☐ ☐

Total agreement

**28. Refreshment points of the PoliTO campus (e.g. bar, snack points...)**

*Mark one option.*

1 2 3 4 5

☐ ☐ ☐ ☐ ☐



---

**36. Presence of car sharing stations**

*Mark one option.*

1

2

3

4

5

---

Strong disagreement

☐☐☐☐☐

Total agreement

---
